# Supplementary material for: Aguilar Soria, retrato de un bienaventurado
Source: MDPI journal article supplement (doi:10.3390/molecules27196570), 1999-01-01
Supplement: s1 [file s1]

Figure S1 Effect of carbon source on enzyme production by fermentation of strain (a); Effect of nitrogen source on enzyme production by fermentation of strain (b).

Table S1 Box-Behnken Test Factors and Levels.

Table S2 Box-Behnken Experimental Design and Results.

Table S3 Analysis of variance of protease activity regression model.

Table S4 Response surface methodology for protease activity estimation.

Figure S2 Effects of different substrates on protease activity(a); Detection of proteases and their types of *Bacillus velezensis* Z-1 by inhibitor gelatin immersing gel zymography (b).

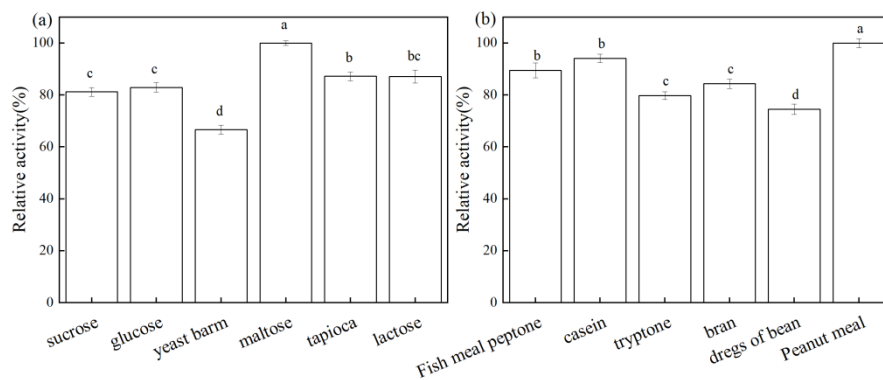

Figure S1 Effect of carbon source on enzyme production by fermentation of strain (a);  
Effect of nitrogen source on enzyme production by fermentation of strain (b).

Table S1 Box-Behnken Test Factors and Levels.

| Level | Temperature°C (A) | pH (B) | NaCl addition% (C) |
|-------|-------------------|--------|--------------------|
| -1    | 35                | 6      | 0                  |
| 0     | 37                | 7.5    | 1                  |
| 1     | 39                | 9      | 2                  |

Table S2 Box-Behnken Experimental Design and Results.

| Number | A  | B   | C | R1    |
|--------|----|-----|---|-------|
| 1      | 35 | 6   | 1 | 5.54  |
| 2      | 39 | 6   | 1 | 6.94  |
| 3      | 35 | 9   | 1 | 8.06  |
| 4      | 39 | 9   | 1 | 9.93  |
| 5      | 35 | 7.5 | 0 | 14.36 |
| 6      | 39 | 7.5 | 0 | 12.90 |
| 7      | 35 | 7.5 | 2 | 6.90  |
| 8      | 39 | 7.5 | 2 | 4.53  |
| 9      | 37 | 6   | 0 | 8.93  |
| 10     | 37 | 9   | 0 | 13.67 |
| 11     | 37 | 6   | 2 | 2.07  |
| 12     | 37 | 9   | 2 | 2.22  |
| 13     | 37 | 7.5 | 1 | 17.15 |
| 14     | 37 | 7.5 | 1 | 15.64 |
| 15     | 37 | 7.5 | 1 | 16.21 |
| 16     | 37 | 7.5 | 1 | 16.66 |
| 17     | 37 | 7.5 | 1 | 15.66 |

Table S3 Analysis of variance of protease activity regression model.

| Variance source | Sum of squares | Freedom | Mean square | F     | P        | Significance    |
|-----------------|----------------|---------|-------------|-------|----------|-----------------|
| Model           | 423.8          | 9       | 47.09       | 37.37 | < 0.0001 | Significant     |
| A               | 0.039          | 1       | 0.039       | 0.031 | 0.865    | -               |
| B               | 13.53          | 1       | 13.53       | 10.73 | 0.0136   | *               |
| C               | 145.68         | 1       | 145.68      | 115.6 | < 0.0001 | **              |
| AB              | 0.055          | 1       | 0.055       | 0.044 | 0.8401   |                 |
| AC              | 0.21           | 1       | 0.21        | 0.16  | 0.6973   |                 |
| BC              | 5.26           | 1       | 5.26        | 4.18  | 0.0803   |                 |
| A <sup>2</sup>  | 34.15          | 1       | 34.15       | 27.11 | 0.0012   |                 |
| B <sup>2</sup>  | 141.52         | 1       | 141.52      | 112.3 | < 0.0001 |                 |
| C <sup>2</sup>  | 58.98          | 1       | 58.98       | 46.81 | 0.0002   |                 |
| Residual        | 8.82           | 7       | 1.26        | /     | /        |                 |
| Lack of Fit     | 7.12           | 3       | 2.37        | 5.57  | 0.0653   | not significant |
| Pure Error      | 1.7            | 4       | 0.43        | /     | /        |                 |
| Cor Total       | 432.62         | 16      | /           | /     | /        |                 |

$R^2=0.9796$ ;  $R_{adj}^2=0.9534$

Table S4 Response surface methodology for protease activity estimation.

| Number | Temperature (°C) | pH   | NaCl addition (%) | Protease activity(U/mL) |
|--------|------------------|------|-------------------|-------------------------|
| 1      | 37.09            | 7.73 | 0.42              | 17.6419                 |
| 2      | 36.79            | 7.68 | 0.45              | 17.5882                 |
| 3      | 37.28            | 7.70 | 0.46              | 17.5852                 |
| 4      | 37.29            | 7.84 | 0.40              | 17.5848                 |
| 5      | 37.20            | 7.71 | 0.51              | 17.5831                 |
| 6      | 37.18            | 7.66 | 0.33              | 17.581                  |
| 7      | 37.06            | 7.71 | 0.54              | 17.5737                 |
| 8      | 37.05            | 7.80 | 0.54              | 17.57                   |
| 9      | 37.30            | 7.86 | 0.38              | 17.5696                 |
| 10     | 36.82            | 7.92 | 0.46              | 17.5299                 |
| 11     | 37.26            | 7.79 | 0.25              | 17.5236                 |
| 12     | 37.41            | 7.90 | 0.35              | 17.4886                 |
| 13     | 37.03            | 7.60 | 0.25              | 17.4742                 |
| 14     | 37.48            | 7.85 | 0.46              | 17.4593                 |
| 15     | 36.73            | 7.98 | 0.37              | 17.4524                 |

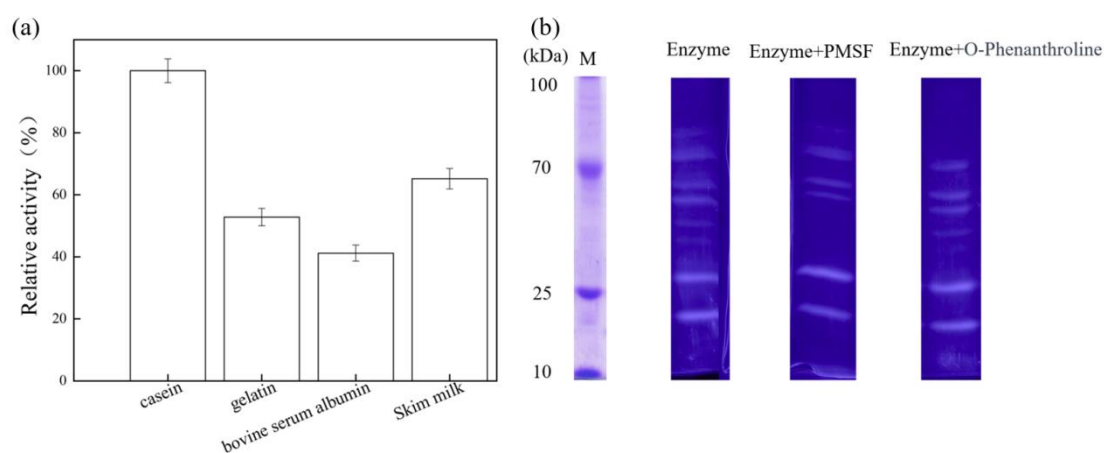

Figure S2 Effects of different substrates on protease activity(a); Detection of proteases and their types of *Bacillus velezensis* Z-1 by inhibitor gelatin immersing gel zymography (b).
